# Supplementary material
Source: PubMed Central journal article supplement (PMC8437247)
Supplement: ehp7668.s001.acco.pdf [file ehp7668.s001.acco.pdf]

**Note to readers with disabilities:** *EHP* strives to ensure that all journal content is accessible to all readers. However, some figures and Supplemental Material published in *EHP* articles may not conform to [508 standards](#) due to the complexity of the information being presented. If you need assistance accessing journal content, please contact [ehp508@niehs.nih.gov](mailto:ehp508@niehs.nih.gov). Our staff will work with you to assess and meet your accessibility needs within 3 working days.

### **Supplemental Material**

#### **Ambient Air Pollution and Long-Term Trajectories of Episodic Memory Decline among Older Women in the WHIMS-ECHO Cohort**

Xinhui Wang, Diana Younan, Andrew J. Petkus, Daniel P. Beavers, Mark A. Espeland, Helena C. Chui, Susan M. Resnick, Margaret Gatz, Joel D. Kaufman, Gregory A. Wellenius, Eric A. Whitsel, JoAnn E. Manson, and Jiu-Chiuan Chen

#### **Table of Contents**

**Table S1.** Distribution of air pollution exposure and population characteristics in the WHIMS-ECHO cohort included vs. excluded, mean  $\pm$  SD or n(%). All characteristics classified at WHI inception (1993–1998) unless otherwise indicated.

**Table S2.** Pearson correlations between remote and recent PM<sub>2.5</sub> and NO<sub>2</sub> exposures.

**Table S3.** Model fit statistics of the latent class mixture models, stratified by baseline age ( $\leq 80$  vs.  $> 80$ ).

**Table S4.** Summary of global associations between air pollution exposure and episodic memory decline from LCMM with 2-latent classes specified, stratified by age and exposure time-windows.

**Table S5.** Summary of sensitivity analyses for latent class-specific associations between air pollution exposure and episodic memory decline among women  $\leq 80$  years, stratified by exposure time-windows.

**Table S6.** Summary of sensitivity analyses for latent class-specific associations between air pollution exposure and episodic memory decline among women  $> 80$  years, stratified by exposure time-windows.

**Table S7.** Summary of latent class-specific associations between air pollution exposure and episodic memory level, stratified by age and exposure time-windows.

**Table S8.** Summary of literature review on longitudinal studies investigating the association between ambient air pollution and episodic memory decline.

## References

**Table S1.** Distribution of air pollution exposure and population characteristics in the WHIMS-ECHO cohort included vs. excluded, mean  $\pm$  SD or n(%). All characteristics classified at WHI inception (1993–1998) unless otherwise indicated.

| Characteristics                                       | N non-missing | ECHO cohort <sup>a</sup><br>(n=2880) | Included<br>(n=2056) | Excluded <sup>a</sup><br>(n=824) | p-value |
|-------------------------------------------------------|---------------|--------------------------------------|----------------------|----------------------------------|---------|
| <b>Air Pollution<sup>b</sup> Exposures:</b>           |               |                                      |                      |                                  |         |
| Remote PM <sub>2.5</sub> ( $\mu\text{g}/\text{m}^3$ ) | 2782          | 13.35 $\pm$ 2.72                     | 13.29 $\pm$ 2.71     | 13.52 $\pm$ 2.76                 | 0.04    |
| Recent PM <sub>2.5</sub> ( $\mu\text{g}/\text{m}^3$ ) | 2847          | 10.59 $\pm$ 2.02                     | 10.52 $\pm$ 2.01     | 10.78 $\pm$ 2.03                 | 0.002   |
| Remote NO <sub>2</sub> (ppb)                          | 2782          | 15.91 $\pm$ 7.30                     | 15.82 $\pm$ 7.26     | 16.15 $\pm$ 7.41                 | 0.29    |
| Recent NO <sub>2</sub> (ppb)                          | 2847          | 10.62 $\pm$ 5.09                     | 10.47 $\pm$ 4.98     | 11.00 $\pm$ 5.33                 | 0.01    |
| <b>Age at WHIMS-ECHO enrollment (years)</b>           | 2880          | 81.77 $\pm$ 3.61                     | 81.51 $\pm$ 3.52     | 82.42 $\pm$ 3.75                 | <0.001  |
| <b>Neighborhood SES<sup>c</sup></b>                   |               |                                      |                      |                                  |         |
| At WHI inception                                      | 2755          | 0.44 $\pm$ 5.31                      | 0.59 $\pm$ 5.26      | 0.00 $\pm$ 5.43                  | 0.01    |
| At WHIMS-ECHO enrollment                              | 2879          | 0.00 $\pm$ 5.16                      | 0.12 $\pm$ 5.11      | -0.31 $\pm$ 5.27                 | 0.04    |
| <b>Region</b>                                         |               |                                      |                      |                                  | <0.001  |
| Northeast                                             |               | 872 (30.3)                           | 662 (32.2)           | 210 (25.5)                       |         |
| South                                                 |               | 625 (21.7)                           | 408 (19.8)           | 217 (26.3)                       |         |
| Midwest                                               |               | 684 (23.8)                           | 498 (24.2)           | 186 (22.6)                       |         |
| West                                                  |               | 699 (24.3)                           | 488 (23.7)           | 211 (25.6)                       |         |
| <b>Race/Ethnicity</b>                                 |               |                                      |                      |                                  | <0.001  |
| American Indian or Alaskan Native                     |               | 6 (0.2)                              | 4 (0.2)              | 2 (0.2)                          |         |
| Asian or Pacific Islander                             |               | 42 (1.5)                             | 17 (0.8)             | 25 (3.0)                         |         |
| Black, non-Hispanic                                   |               | 180 (6.3)                            | 107 (5.2)            | 73 (8.9)                         |         |
| Hispanic/Latino                                       |               | 47 (1.6)                             | 29 (1.4)             | 18 (2.2)                         |         |
| White, non-Hispanic                                   |               | 2559 (88.9)                          | 1875 (91.2)          | 684 (83.0)                       |         |
| Other <sup>d</sup>                                    |               | 43 (1.5)                             | 23 (1.1)             | 20 (2.4)                         |         |
| Missing                                               |               | 3 (0.1)                              | 1 (0.1)              | 2 (0.2)                          |         |
| <b>Education</b>                                      |               |                                      |                      |                                  | <0.001  |
| $\leq$ High school or GED                             |               | 742 (25.8)                           | 500 (24.3)           | 242 (29.6)                       |         |
| >High school <4 years of college                      |               | 1139 (39.6)                          | 789 (38.4)           | 350 (42.7)                       |         |
| $\geq$ 4 years of college                             |               | 994 (34.6)                           | 767 (37.3)           | 227 (27.7)                       |         |
| <b>Employment</b>                                     |               |                                      |                      |                                  | 0.41    |
| Currently working                                     |               | 433 (15.1)                           | 321 (15.6)           | 112 (13.7)                       |         |
| Not working                                           |               | 270 (9.4)                            | 195 (9.5)            | 75 (9.2)                         |         |
| Retired                                               |               | 2168 (75.5)                          | 1540 (74.9)          | 628 (77.1)                       |         |
| <b>Income (\$)</b>                                    |               |                                      |                      |                                  | <0.001  |
| <9,999                                                |               | 112 (3.9)                            | 68 (3.3)             | 44 (5.3)                         |         |
| 10,000-34,999                                         |               | 1307 (45.4)                          | 906 (44.1)           | 401 (48.7)                       |         |
| 35,000-49,999                                         |               | 628 (21.8)                           | 450 (21.9)           | 178 (21.6)                       |         |
| 50,000-74,999                                         |               | 420 (14.6)                           | 321 (15.6)           | 99 (12.0)                        |         |
| $\geq$ 75,000                                         |               | 264 (9.2)                            | 212 (10.3)           | 52 (6.3)                         |         |
| Don't know                                            |               | 149 (5.2)                            | 99 (4.8)             | 50 (6.1)                         |         |
| <b>Smoking status</b>                                 |               |                                      |                      |                                  | 0.44    |
| Never smoked                                          |               | 1572 (55.1)                          | 1138 (55.4)          | 434 (54.6)                       |         |
| Past smoker                                           |               | 1138 (39.9)                          | 823 (40.0)           | 315 (39.6)                       |         |
| Current Smoker                                        |               | 141 (4.9)                            | 95 (4.6)             | 46 (5.8)                         |         |
| <b>Alcohol use</b>                                    |               |                                      |                      |                                  | 0.07    |
| Non-drinker                                           |               | 351 (12.3)                           | 243 (11.8)           | 108 (13.4)                       |         |
| Past drinker                                          |               | 503 (17.6)                           | 342 (16.6)           | 161 (20.0)                       |         |
| <1 drink per day                                      |               | 1643 (57.5)                          | 1204 (58.6)          | 439 (54.7)                       |         |

|                                       |  |             |             |            |      |
|---------------------------------------|--|-------------|-------------|------------|------|
| ≥1 drink per day                      |  | 362 (12.7)  | 267 (13)    | 95 (11.8)  |      |
| <b>Physical activity<sup>e</sup></b>  |  |             |             |            | 0.25 |
| No activity                           |  | 1584 (55.1) | 1109 (53.9) | 475 (57.9) |      |
| Some activity                         |  | 152 (5.3)   | 114 (5.5)   | 38 (4.6)   |      |
| 2-4 episodes/week                     |  | 597 (20.8)  | 439 (21.4)  | 158 (19.3) |      |
| >4 episodes/week                      |  | 543 (18.9)  | 394 (19.2)  | 149 (18.2) |      |
| <b>Hypercholesterolemia</b>           |  |             |             |            | 0.01 |
| No                                    |  | 2336 (82.3) | 1716 (83.5) | 620 (79.4) |      |
| Yes                                   |  | 501 (17.7)  | 340 (16.5)  | 161 (20.6) |      |
| <b>Diabetes</b>                       |  |             |             |            | 0.08 |
| No                                    |  | 2753 (95.7) | 1976 (96.1) | 777 (94.6) |      |
| Yes                                   |  | 124 (4.3)   | 80 (3.9)    | 44 (5.4)   |      |
| <b>Hormone treatment</b>              |  |             |             |            | 0.91 |
| No                                    |  | 1580 (54.9) | 1127 (54.8) | 453 (55.0) |      |
| Yes                                   |  | 1299 (45.1) | 929 (45.2)  | 370 (45.0) |      |
| <b>Hypertension</b>                   |  |             |             |            |      |
| <b>At WHI inception</b>               |  |             |             |            | 0.24 |
| No                                    |  | 1865 (65.3) | 1357 (66.0) | 508 (63.7) |      |
| Yes                                   |  | 989 (34.7)  | 699 (34.0)  | 290 (36.3) |      |
| <b>At WHIMS-ECHO enrollment</b>       |  |             |             |            | 0.08 |
| No                                    |  | 919 (31.9)  | 676 (32.9)  | 243 (29.5) |      |
| Yes                                   |  | 1961 (68.1) | 1380 (67.1) | 581 (70.5) |      |
| <b>Cardiovascular disease history</b> |  |             |             |            |      |
| <b>At WHI inception</b>               |  |             |             |            | 0.88 |
| No                                    |  | 2434 (85.6) | 1759 (85.6) | 675 (85.8) |      |
| Yes                                   |  | 409 (14.4)  | 297 (14.4)  | 112 (14.2) |      |
| <b>At WHIMS-ECHO enrollment</b>       |  |             |             |            | 0.14 |
| No                                    |  | 2171 (76.3) | 1583 (77.0) | 588 (74.3) |      |
| Yes                                   |  | 676 (23.7)  | 473 (23.0)  | 203 (25.7) |      |
| <b>WHI Hormone Therapy Assignment</b> |  |             |             |            | 0.61 |
| Estrogen-alone control                |  | 531 (18.4)  | 375 (18.2)  | 156 (18.9) |      |
| Estrogen-alone intervention           |  | 521 (18.1)  | 362 (17.6)  | 159 (19.3) |      |
| Estrogen+Progestin control            |  | 947 (32.9)  | 688 (33.5)  | 259 (31.4) |      |
| Estrogen+Progestin intervention       |  | 881 (30.6)  | 631 (30.7)  | 250 (30.3) |      |

All covariates were assessed at WHI inception unless otherwise noted. All p-values were calculated using t-test for continuous variables, Fisher's exact test for race/ethnicity, or chi-square test for other categorical variables.

<sup>a</sup> Numbers in the WHIMS-ECHO cohort or the excluded population may not add up to total due to missing.

<sup>b</sup> Recent exposures were 3-year average exposures estimated at the WHIMS-ECHO enrollment. Remote exposures were 3-year average exposures estimated 10 years before the WHIMS-ECHO enrollment.

<sup>c</sup> Neighborhood SES is the sum of six standardized U.S. Census tract-level variables measuring domains of wealth/income, education, and occupation. Higher values indicate higher neighborhood socioeconomic status.

<sup>d</sup> "Other" race/ethnicity includes women who did not select one of the 5 specific race/ethnicity groups.

<sup>e</sup> Moderate or strenuous physical activities ≥20 minutes

**Table S2.** Pearson correlations<sup>a</sup> between remote and recent PM<sub>2.5</sub> and NO<sub>2</sub> exposures<sup>b</sup>.

|                                | Aged ≤80 years (N=828)   |                          |                        |                        | Aged >80 years (N=1228)  |                          |                        |                        |
|--------------------------------|--------------------------|--------------------------|------------------------|------------------------|--------------------------|--------------------------|------------------------|------------------------|
|                                | Remote PM <sub>2.5</sub> | Recent PM <sub>2.5</sub> | Remote NO <sub>2</sub> | Recent NO <sub>2</sub> | Remote PM <sub>2.5</sub> | Recent PM <sub>2.5</sub> | Remote NO <sub>2</sub> | Recent NO <sub>2</sub> |
| <b>Remote PM<sub>2.5</sub></b> | 1                        |                          |                        |                        | 1                        |                          |                        |                        |
| <b>Recent PM<sub>2.5</sub></b> | 0.80                     | 1                        |                        |                        | 0.80                     | 1                        |                        |                        |
| <b>Remote NO<sub>2</sub></b>   | 0.60                     | 0.38                     | 1                      |                        | 0.65                     | 0.46                     | 1                      |                        |
| <b>Recent NO<sub>2</sub></b>   | 0.56                     | 0.45                     | 0.91                   | 1                      | 0.57                     | 0.51                     | 0.90                   | 1                      |

<sup>a</sup>all p-values < 0.001

<sup>b</sup>remote PM<sub>2.5</sub>: 3-year average of PM<sub>2.5</sub> 10 years before the WHIMS-ECHO enrollment (µg/m<sup>3</sup>)

recent PM<sub>2.5</sub>: 3-year average of PM<sub>2.5</sub> at the WHIMS-ECHO enrollment (µg/m<sup>3</sup>)

remote NO<sub>2</sub>: 3-year average of NO<sub>2</sub> 10 years before the WHIMS-ECHO enrollment (ppb)

recent NO<sub>2</sub>: 3-year average of NO<sub>2</sub> at the WHIMS-ECHO enrollment (ppb)

**Table S3.** Model fit statistics of the latent class mixture models, stratified by baseline age ( $\leq 80$  vs.  $> 80$ ).<sup>a</sup>

| Age group       | Number of classes estimated | -2LL <sup>b</sup> | Parameters <sup>c</sup> | BIC   | Class membership                                                          | Mean posterior probabilities                                            |
|-----------------|-----------------------------|-------------------|-------------------------|-------|---------------------------------------------------------------------------|-------------------------------------------------------------------------|
| $\leq 80$ years | One                         | -12871            | 5                       | 25777 | Class 1 = 100%                                                            | Class 1 = 1.00                                                          |
| $\leq 80$ years | Two                         | -12791            | 9                       | 25642 | Class 1 = 77.7%,<br>Class 2 = 22.3%                                       | Class 1 = 0.85,<br>Class 2 = 0.75                                       |
| $\leq 80$ years | Three                       | -12779            | 13                      | 25646 | Class 1 = 64.3%,<br>Class 2 = 4.1%,<br>Class 3 = 31.6%                    | Class 1 = 0.79,<br>Class 2 = 0.69,<br>Class 3 = 0.66                    |
| $\leq 80$ years | Four                        | -12776            | 17                      | 25666 | Class 1 = 63.3%,<br>Class 2 = 24.4%,<br>Class 3 = 8.8%,<br>Class 4 = 3.5% | Class 1 = 0.78,<br>Class 2 = 0.62,<br>Class 3 = 0.52,<br>Class 4 = 0.66 |
| $> 80$ years    | One                         | -16956            | 5                       | 33947 | Class 1 = 100%                                                            | Class 1 = 1.00                                                          |
| $> 80$ years    | Two                         | -16855            | 9                       | 33774 | Class 1 = 28.6%,<br>Class 2 = 71.4%                                       | Class 1 = 0.78,<br>Class 2 = 0.75                                       |
| $> 80$ years    | Three                       | -16838            | 13                      | 33769 | Class 1 = 74.8%,<br>Class 2 = 2.3%,<br>Class 3 = 22.9%                    | Class 1 = 0.72,<br>Class 2 = 0.81,<br>Class 3 = 0.71                    |
| $> 80$ years    | Four                        | -16832            | 17                      | 33784 | Class 1 = 57.2%,<br>Class 2 = 39.7%,<br>Class 3 = 1.5%,<br>Class 4 = 1.5% | Class 1 = 0.64,<br>Class 2 = 0.69,<br>Class 3 = 0.72,<br>Class 4 = 0.85 |

Abbreviations: BIC, Bayesian Information Criterion; WHIMS-ECHO, Women's Health Initiative Memory Study-Epidemiology of Cognitive Health Outcomes

<sup>a</sup>All models include age at WHIMS-ECHO enrollment and follow-up time as independent variables.

<sup>b</sup>-2LL = negative log likelihood from respective model

<sup>c</sup>Parameters = number of parameters in each respective model, including 2 parameters for the link function (intercept and standard error of linear transformation) used for the CVLT outcome, 1 parameter for the variance of random-effect of intercept specified, 2\*ng parameters for the class-specific estimates of the two covariates included, (ng-1) parameters for intercepts estimated from the latent class membership model, and (ng-1) parameters for intercepts estimated from the longitudinal model. Here, ng=number of latent classes specified in LCMM.

**Table S4.** Summary of global associations between air pollution exposure and episodic memory decline from LCMM with 2-latent classes specified, stratified by age and exposure time-windows.

|                             | PM <sub>2.5</sub> Effect Estimates |                |                |       |                              |                |               |      | NO <sub>2</sub> Effect Estimates |                |                |       |                              |                |               |      |
|-----------------------------|------------------------------------|----------------|----------------|-------|------------------------------|----------------|---------------|------|----------------------------------|----------------|----------------|-------|------------------------------|----------------|---------------|------|
|                             | Recent Exposure <sup>a</sup>       |                |                |       | Remote Exposure <sup>a</sup> |                |               |      | Recent Exposure <sup>a</sup>     |                |                |       | Remote Exposure <sup>a</sup> |                |               |      |
|                             | N                                  | β <sup>b</sup> | (95% CI)       | p     | N                            | β <sup>b</sup> | (95% CI)      | p    | N                                | β <sup>b</sup> | (95% CI)       | p     | N                            | β <sup>b</sup> | (95% CI)      | p    |
| <b>≤80 years</b>            |                                    |                |                |       |                              |                |               |      |                                  |                |                |       |                              |                |               |      |
| Model 1 <sup>c</sup>        | 828                                | -0.15          | (-0.26, -0.03) | 0.01  | 828                          | -0.08          | (-0.17, 0.01) | 0.07 | 828                              | -0.01          | (-0.11, 0.09)  | 0.83  | 828                          | 0.02           | (-0.09, 0.13) | 0.74 |
| Model 2 <sup>d</sup>        | 828                                | -0.14          | (-0.26, -0.03) | 0.01  | 828                          | -0.08          | (-0.18, 0.02) | 0.12 | 828                              | -0.01          | (-0.10, 0.08)  | 0.78  | 828                          | 0.02           | (-0.08, 0.11) | 0.74 |
| Excl. Dementia <sup>e</sup> | 713                                | -0.14          | (-0.24, -0.05) | 0.003 | –                            | –              | –             | –    | 713                              | -0.01          | (-0.08, 0.07)  | 0.90  | –                            | –              | –             | –    |
| Excl. Stroke <sup>f</sup>   | 775                                | -0.13          | (-0.23, -0.04) | 0.005 | –                            | –              | –             | –    | 775                              | -0.01          | (-0.10, 0.07)  | 0.80  | –                            | –              | –             | –    |
| <b>&gt;80 years</b>         |                                    |                |                |       |                              |                |               |      |                                  |                |                |       |                              |                |               |      |
| Model 1 <sup>c</sup>        | 1228                               | -0.03          | (-0.15, 0.09)  | 0.59  | 1228                         | 0.04           | (-0.05, 0.14) | 0.40 | 1228                             | -0.09          | (-0.20, 0.01)  | 0.08  | 1228                         | -0.03          | (-0.14, 0.08) | 0.62 |
| Model 2 <sup>d</sup>        | 1228                               | -0.04          | (-0.16, 0.08)  | 0.51  | 1228                         | 0.04           | (-0.06, 0.14) | 0.41 | 1228                             | -0.10          | (-0.20, 0.01)  | 0.07  | 1228                         | -0.03          | (-0.14, 0.08) | 0.61 |
| Excl. Dementia <sup>e</sup> | 961                                | -0.07          | (-0.15, 0.02)  | 0.15  | –                            | –              | –             | –    | 961                              | -0.11          | (-0.19, -0.03) | 0.005 | –                            | –              | –             | –    |
| Excl. Stroke <sup>f</sup>   | 1120                               | -0.05          | (-0.14, 0.03)  | 0.23  | –                            | –              | –             | –    | 1120                             | -0.10          | (-0.18, -0.02) | 0.01  | –                            | –              | –             | –    |

<sup>a</sup> Recent exposures were 3-year average exposures estimated at the WHIMS-ECHO enrollment. Remote exposures were 3-year average exposures estimated 10 years before the WHIMS-ECHO enrollment.

recent 3-year PM<sub>2.5</sub>: IQR = 2.88 µg/m<sup>3</sup>

remote 3-year PM<sub>2.5</sub>: IQR = 3.27 µg/m<sup>3</sup>

recent 3-year NO<sub>2</sub>: IQR = 6.25 ppb

remote 3-year NO<sub>2</sub>: IQR = 9.47 ppb

<sup>b</sup> β represents the average increase in CVLT score per year for each interquartile range (IQR) increase of 3-year average exposure. A negative β means higher air pollution exposure was associated with a greater decline in episodic memory.

<sup>c</sup> Model 1 was adjusted for age, follow-up time, age interaction with follow-up time, and time-varying propensity scores.

<sup>d</sup> Model 2 was adjusted for age, follow-up time, geographic region, self-reported race/ethnicity (where “other” includes women who reported they were American Indian or Alaskan Native, or Asian or Pacific Islander, or women who selected “other” instead of one of the five specific race/ethnicity categories, and women with missing data for race/ethnicity), SES (education, income, employment status, and neighborhood SES), lifestyle factors (smoking, drinking and physical activities), hormone treatment, cardiovascular risk factors (hypertension, diabetes and hypercholesterolemia), CVD histories, age interaction with follow-up time, and time-varying propensity scores.

<sup>e</sup> Excluding women with incident probable dementia during the follow up. Latent class memberships were assigned based on Model 2.

<sup>f</sup> Excluding women with either prevalent stroke or incident stroke during the follow up. Latent class memberships were assigned based on Model 2.

**Table S5.** Summary of sensitivity analyses for latent class-specific associations between air pollution exposure and episodic memory decline among women ≤80 years, stratified by exposure time-windows.

|                                    | PM <sub>2.5</sub> Effect Estimates |                |                |      |                              |                |               |      | NO <sub>2</sub> Effect Estimates |                |               |      |                              |                |               |      |
|------------------------------------|------------------------------------|----------------|----------------|------|------------------------------|----------------|---------------|------|----------------------------------|----------------|---------------|------|------------------------------|----------------|---------------|------|
|                                    | Recent Exposure <sup>a</sup>       |                |                |      | Remote Exposure <sup>a</sup> |                |               |      | Recent Exposure <sup>a</sup>     |                |               |      | Remote Exposure <sup>a</sup> |                |               |      |
|                                    | N                                  | β <sup>b</sup> | (95% CI)       | p    | N                            | β <sup>b</sup> | (95% CI)      | p    | N                                | β <sup>b</sup> | (95% CI)      | p    | N                            | β <sup>b</sup> | (95% CI)      | p    |
| <b>Slow-decliners<sup>c</sup></b>  |                                    |                |                |      |                              |                |               |      |                                  |                |               |      |                              |                |               |      |
| Model 2 <sup>d</sup> (main)        | 597                                | -0.16          | (-0.28, -0.03) | 0.01 | 596                          | -0.11          | (-0.22, 0.01) | 0.06 | 602                              | -0.004         | (-0.19, 0.18) | 0.97 | 612                          | 0.003          | (-0.15, 0.16) | 0.97 |
| Recent exposure IQR <sup>e</sup>   | –                                  | –              | –              | –    | 596                          | -0.09          | (-0.19, 0.01) | 0.06 | –                                | –              | –             | –    | 612                          | 0.002          | (-0.10, 0.11) | 0.97 |
| Without PS <sup>f</sup>            | 601                                | -0.15          | (-0.28, -0.03) | 0.02 | 600                          | -0.10          | (-0.22, 0.01) | 0.07 | 598                              | -0.002         | (-0.07, 0.07) | 0.95 | 614                          | -0.01          | (-0.12, 0.11) | 0.93 |
| With practice <sup>g</sup>         | 591                                | -0.16          | (-0.28, -0.03) | 0.01 | 593                          | -0.11          | (-0.22, 0.01) | 0.06 | 595                              | -0.01          | (-0.10, 0.09) | 0.92 | 606                          | -0.001         | (-0.06, 0.05) | 0.97 |
| WHIMS-EHCO covariates <sup>h</sup> | 596                                | -0.16          | (-0.28, -0.03) | 0.01 | –                            | –              | –             | –    | 598                              | -0.004         | (-0.12, 0.11) | 0.94 | –                            | –              | –             | –    |
| <b>Fast-decliners<sup>c</sup></b>  |                                    |                |                |      |                              |                |               |      |                                  |                |               |      |                              |                |               |      |
| Model 2 <sup>d</sup> (main)        | 231                                | -0.06          | (-0.32, 0.20)  | 0.64 | 232                          | 0.06           | (-0.19, 0.32) | 0.62 | 226                              | -0.21          | (-0.45, 0.04) | 0.10 | 216                          | -0.04          | (-0.33, 0.24) | 0.76 |
| Recent exposure IQR <sup>e</sup>   | –                                  | –              | –              | –    | 232                          | 0.06           | (-0.17, 0.28) | 0.62 | –                                | –              | –             | –    | 216                          | -0.03          | (-0.22, 0.16) | 0.76 |
| Without PS <sup>f</sup>            | 227                                | -0.06          | (-0.32, 0.20)  | 0.66 | 228                          | 0.07           | (-0.19, 0.32) | 0.60 | 230                              | -0.21          | (-0.45, 0.03) | 0.09 | 214                          | -0.05          | (-0.33, 0.22) | 0.70 |
| With practice <sup>g</sup>         | 237                                | -0.07          | (-0.31, 0.18)  | 0.58 | 235                          | 0.05           | (-0.20, 0.30) | 0.69 | 233                              | -0.21          | (-0.46, 0.03) | 0.08 | 222                          | -0.06          | (-0.33, 0.21) | 0.67 |
| WHIMS-EHCO covariates <sup>h</sup> | 232                                | -0.05          | (-0.36, 0.26)  | 0.74 | –                            | –              | –             | –    | 230                              | -0.21          | (-0.45, 0.03) | 0.09 | –                            | –              | –             | –    |

Numbers of women within each latent class vary because women are assigned to the latent class with the highest probability according to each latent class mixed model.

<sup>a</sup>Recent exposures were 3-year average exposures estimated at the WHIMS-ECHO enrollment. Remote exposures were 3-year average exposures estimated 10 years before the WHIMS-ECHO enrollment.

recent 3-year PM<sub>2.5</sub>: IQR = 2.88 µg/m<sup>3</sup>

remote 3-year PM<sub>2.5</sub>: IQR = 3.27 µg/m<sup>3</sup>

recent 3-year NO<sub>2</sub>: IQR = 6.25 ppb

remote 3-year NO<sub>2</sub>: IQR = 9.47 ppb

<sup>b</sup>β represents the average increase in CVLT score per year for each interquartile range increase of 3-year average exposure. Negative β means greater air pollution exposure was associated with faster decline of episodic memory.

<sup>c</sup>Two latent trajectory subgroups were generated simultaneously from multivariate adjusted models in each scenario listed.

<sup>d</sup>Model 2 was adjusted for age, follow-up time, geographic region, self-reported race/ethnicity (where “other” includes women who reported they were American Indian or Alaskan Native, or Asian or Pacific Islander, or women who selected “other” instead of one of the five specific race/ethnicity categories, and women with missing data for race/ethnicity), SES (education, income, employment status, and neighborhood SES), lifestyle factors (smoking, drinking and physical activities), hormone treatment, cardiovascular risk factors (hypertension, diabetes and hypercholesterolemia), CVD histories, age interaction with follow-up time, and time-varying propensity scores.

<sup>e</sup>Model was adjusted for covariates in Model 2. Remote exposure was scaled by IQR of the corresponding recent exposure.

<sup>f</sup>Model was adjusted for covariates in Model 2, except for time-varying propensity scores.

<sup>g</sup>Model was adjusted for covariates in Model 2 and practice indicator.



<sup>h</sup>Model was adjusted for covariates in Model 2, where neighborhood SES, hypertension, and CVD histories were assessed at the WHIMS-ECHO enrollment. Estimates were not reported for remote exposures as this sensitivity analysis was not applicable to remote exposures.

**Table S6.** Summary of sensitivity analyses for latent class-specific associations between air pollution exposure and episodic memory decline among women >80 years, stratified by exposure time-windows.

|                                          | PM <sub>2.5</sub> Effect Estimates |                |               |      |                              |                |               |      | NO <sub>2</sub> Effect Estimates |                |               |      |                              |                |               |      |
|------------------------------------------|------------------------------------|----------------|---------------|------|------------------------------|----------------|---------------|------|----------------------------------|----------------|---------------|------|------------------------------|----------------|---------------|------|
|                                          | Recent Exposure <sup>a</sup>       |                |               |      | Remote Exposure <sup>a</sup> |                |               |      | Recent Exposure <sup>a</sup>     |                |               |      | Remote Exposure <sup>a</sup> |                |               |      |
|                                          | N                                  | β <sup>b</sup> | (95% CI)      | p    | N                            | β <sup>b</sup> | (95% CI)      | p    | N                                | β <sup>b</sup> | (95% CI)      | p    | N                            | β <sup>b</sup> | (95% CI)      | p    |
| <b>Cognitively-resilient<sup>c</sup></b> |                                    |                |               |      |                              |                |               |      |                                  |                |               |      |                              |                |               |      |
| Model 2 <sup>d</sup> (main)              | 406                                | -0.03          | (-0.19, 0.13) | 0.71 | 432                          | 0.09           | (-0.04, 0.22) | 0.18 | 413                              | -0.10          | (-0.24, 0.03) | 0.12 | 418                          | -0.02          | (-0.17, 0.12) | 0.76 |
| Recent exposure IQR <sup>e</sup>         | –                                  | –              | –             | –    | 432                          | 0.08           | (-0.04, 0.19) | 0.18 | –                                | –              | –             | –    | 418                          | -0.02          | (-0.11, 0.08) | 0.76 |
| Without PS <sup>f</sup>                  | 400                                | -0.03          | (-0.18, 0.13) | 0.71 | 433                          | 0.09           | (-0.04, 0.22) | 0.19 | 399                              | -0.11          | (-0.24, 0.03) | 0.11 | 398                          | -0.03          | (-0.18, 0.11) | 0.67 |
| With practice <sup>g</sup>               | 418                                | -0.03          | (-0.26, 0.20) | 0.80 | 429                          | 0.09           | (-0.04, 0.21) | 0.18 | 419                              | -0.10          | (-0.23, 0.03) | 0.12 | 419                          | -0.02          | (-0.16, 0.12) | 0.76 |
| WHIMS-EHCO covariates <sup>h</sup>       | 399                                | -0.02          | (-0.19, 0.15) | 0.81 | –                            | –              | –             | –    | 412                              | -0.10          | (-0.23, 0.03) | 0.13 | –                            | –              | –             | –    |
| <b>Steady-decliners<sup>c</sup></b>      |                                    |                |               |      |                              |                |               |      |                                  |                |               |      |                              |                |               |      |
| Model 2 <sup>d</sup> (main)              | 822                                | -0.03          | (-0.20, 0.14) | 0.72 | 796                          | -0.02          | (-0.17, 0.13) | 0.79 | 815                              | -0.11          | (-0.27, 0.05) | 0.17 | 810                          | -0.05          | (-0.22, 0.11) | 0.52 |
| Recent exposure IQR <sup>e</sup>         | –                                  | –              | –             | –    | 796                          | -0.02          | (-0.15, 0.11) | 0.79 | –                                | –              | –             | –    | 810                          | -0.04          | (-0.14, 0.07) | 0.52 |
| Without PS <sup>f</sup>                  | 828                                | -0.03          | (-0.19, 0.14) | 0.76 | 795                          | -0.02          | (-0.17, 0.13) | 0.78 | 829                              | -0.12          | (-0.28, 0.04) | 0.15 | 830                          | -0.07          | (-0.23, 0.09) | 0.39 |
| With practice <sup>g</sup>               | 810                                | -0.03          | (-0.20, 0.13) | 0.69 | 799                          | -0.02          | (-0.17, 0.13) | 0.81 | 809                              | -0.12          | (-0.28, 0.04) | 0.15 | 809                          | -0.06          | (-0.22, 0.10) | 0.46 |
| WHIMS-EHCO covariates <sup>h</sup>       | 829                                | -0.02          | (-0.19, 0.14) | 0.77 | –                            | –              | –             | –    | 816                              | -0.11          | (-0.27, 0.05) | 0.18 | –                            | –              | –             | –    |

Numbers of women within each latent class vary because women are assigned to the latent class with the highest probability according to each latent class mixed model.

<sup>a</sup>Recent exposures were 3-year average exposures estimated at the WHIMS-ECHO enrollment. Remote exposures were 3-year average exposures estimated 10 years before the WHIMS-ECHO enrollment.

recent 3-year PM<sub>2.5</sub>: IQR = 2.88 µg/m<sup>3</sup>

remote 3-year PM<sub>2.5</sub>: IQR = 3.27 µg/m<sup>3</sup>

recent 3-year NO<sub>2</sub>: IQR = 6.25 ppb

remote 3-year NO<sub>2</sub>: IQR = 9.47 ppb

<sup>b</sup>β represents the average increase in CVLT score per year for each interquartile range increase of 3-year average exposure. Negative β means greater air pollution exposure was associated with faster decline of episodic memory.

<sup>c</sup>Two latent trajectory subgroups were generated simultaneously from multivariate adjusted models in each scenario listed.

<sup>d</sup>Model 2 was adjusted for age, follow-up time, geographic region, self-reported race/ethnicity (where “other” includes women who reported they were American Indian or Alaskan Native, or Asian or Pacific Islander, or women who selected “other” instead of one of the five specific race/ethnicity categories, and women with missing data for race/ethnicity), SES (education, income, employment status, and neighborhood SES), lifestyle factors (smoking, drinking and physical activities), hormone treatment, cardiovascular risk factors (hypertension, diabetes and hypercholesterolemia), CVD histories, age interaction with follow-up time, and time-varying propensity scores.

<sup>e</sup>Model was adjusted for covariates in Model 2. Remote exposure was scaled by IQR of the corresponding recent exposure.

<sup>f</sup>Model was adjusted for covariates in Model 2, except for time-varying propensity scores.

<sup>g</sup>Model was adjusted for covariates in Model 2 and practice indicator.

<sup>h</sup>Model was adjusted for covariates in Model 2, where neighborhood SES, hypertension, and CVD histories were assessed at the WHIMS-ECHO enrollment. Estimates were not reported for remote exposures as this sensitivity analysis was not applicable to remote exposures.

**Table S7.** Summary of latent class-specific associations between air pollution exposure and episodic memory level, stratified by age and exposure time-windows.

|                              | PM <sub>2.5</sub> Effect Estimates |                |               |      |                              |                |               |      | NO <sub>2</sub> Effect Estimates |                |               |      |                              |                |               |      |
|------------------------------|------------------------------------|----------------|---------------|------|------------------------------|----------------|---------------|------|----------------------------------|----------------|---------------|------|------------------------------|----------------|---------------|------|
|                              | Recent Exposure <sup>a</sup>       |                |               |      | Remote Exposure <sup>a</sup> |                |               |      | Recent Exposure <sup>a</sup>     |                |               |      | Remote Exposure <sup>a</sup> |                |               |      |
|                              | N                                  | β <sup>b</sup> | (95% CI)      | p    | N                            | β <sup>b</sup> | (95% CI)      | p    | N                                | β <sup>b</sup> | (95% CI)      | p    | N                            | β <sup>b</sup> | (95% CI)      | p    |
| <b>≤80 years</b>             |                                    |                |               |      |                              |                |               |      |                                  |                |               |      |                              |                |               |      |
| <b>Slow-decliners</b>        |                                    |                |               |      |                              |                |               |      |                                  |                |               |      |                              |                |               |      |
| Model 1 <sup>c</sup>         | 626                                | -0.49          | (-1.33, 0.36) | 0.26 | 622                          | -0.36          | (-1.11, 0.39) | 0.35 | 626                              | -0.10          | (-0.93, 0.72) | 0.81 | 625                          | 0.04           | (-1.00, 1.08) | 0.94 |
| Model 2 <sup>d</sup>         | 605                                | -0.43          | (-1.31, 0.44) | 0.33 | 606                          | -0.28          | (-1.02, 0.47) | 0.47 | 611                              | 0.06           | (-0.77, 0.88) | 0.89 | 610                          | 0.26           | (-0.57, 1.09) | 0.54 |
| <b>Fast-decliners</b>        |                                    |                |               |      |                              |                |               |      |                                  |                |               |      |                              |                |               |      |
| Model 1 <sup>c</sup>         | 202                                | 0.34           | (-1.28, 1.95) | 0.68 | 206                          | -0.06          | (-1.76, 1.64) | 0.94 | 202                              | -0.50          | (-1.94, 0.93) | 0.49 | 203                          | -0.86          | (-2.37, 0.64) | 0.26 |
| Model 2 <sup>d</sup>         | 223                                | -0.0001        | (-0.04, 0.04) | 0.99 | 222                          | 0.10           | (-1.16, 1.36) | 0.88 | 217                              | -0.28          | (-1.59, 1.03) | 0.67 | 218                          | -0.44          | (-1.81, 0.94) | 0.53 |
| <b>&gt;80 years</b>          |                                    |                |               |      |                              |                |               |      |                                  |                |               |      |                              |                |               |      |
| <b>Cognitively-resilient</b> |                                    |                |               |      |                              |                |               |      |                                  |                |               |      |                              |                |               |      |
| Model 1 <sup>c</sup>         | 360                                | -0.13          | (-1.29, 1.04) | 0.83 | 366                          | 0.24           | (-0.70, 1.18) | 0.62 | 375                              | 0.72           | (-0.25, 1.69) | 0.15 | 375                          | 0.54           | (-0.47, 1.54) | 0.29 |
| Model 2 <sup>d</sup>         | 410                                | -0.13          | (-1.33, 1.07) | 0.83 | 410                          | 0.21           | (-0.71, 1.13) | 0.66 | 422                              | 0.45           | (-0.50, 1.39) | 0.35 | 425                          | 0.31           | (-0.67, 1.29) | 0.54 |
| <b>Steady-decliners</b>      |                                    |                |               |      |                              |                |               |      |                                  |                |               |      |                              |                |               |      |
| Model 1 <sup>c</sup>         | 868                                | 0.68           | (-0.28, 1.65) | 0.17 | 862                          | 0.41           | (-0.42, 1.24) | 0.34 | 853                              | 0.63           | (-0.24, 1.50) | 0.15 | 853                          | 0.41           | (-0.51, 1.32) | 0.38 |
| Model 2 <sup>d</sup>         | 818                                | 0.98           | (-0.06, 2.02) | 0.07 | 818                          | 0.48           | (-0.40, 1.36) | 0.28 | 806                              | 0.54           | (-0.38, 1.47) | 0.25 | 803                          | 0.30           | (-0.66, 1.26) | 0.54 |

Numbers of women within each latent class vary because women are assigned to the latent class with the highest probability according to each latent class mixed model.

<sup>a</sup> Recent exposures were 3-year average exposures estimated at the WHIMS-ECHO enrollment. Remote exposures were 3-year average exposures estimated 10 years before the WHIMS-ECHO enrollment.

recent 3-year PM<sub>2.5</sub>: IQR = 2.88 µg/m<sup>3</sup>

remote 3-year PM<sub>2.5</sub>: IQR = 3.27 µg/m<sup>3</sup>

recent 3-year NO<sub>2</sub>: IQR = 6.25 ppb

remote 3-year NO<sub>2</sub>: IQR = 9.47 ppb

<sup>b</sup> β represents the average increase in CVLT score for each interquartile range (IQR) increase of 3-year average exposure. A negative β means greater air pollution exposure was associated with lower episodic memory.

<sup>c</sup> Model 1 was adjusted for age, follow-up time, age interaction with follow-up time, and time-varying propensity scores.

<sup>d</sup> Model 2 was adjusted for age, follow-up time, geographic region, self-reported race/ethnicity (where “other” includes women who reported they were American Indian or Alaskan Native, or Asian or Pacific Islander, or women who selected “other” instead of one of the five specific race/ethnicity categories, and women with missing data for race/ethnicity), SES (education, income, employment status, and neighborhood SES), lifestyle factors (smoking, drinking and physical activities), hormone treatment, cardiovascular risk factors (hypertension, diabetes and hypercholesterolemia), CVD histories, age interaction with follow-up time, and time-varying propensity scores.

**Table S8.** Summary of literature review on longitudinal studies investigating the association between ambient air pollution and episodic memory decline.

| Population Characteristics                                             |                                                                       | Exposure                                                                                                                                  | Exposure Window                                                                                          | Outcome                                                                                                              | Outcome Assessments                                                                                                                             | Association                                                                                                                                                                                                                                                                                     |
|------------------------------------------------------------------------|-----------------------------------------------------------------------|-------------------------------------------------------------------------------------------------------------------------------------------|----------------------------------------------------------------------------------------------------------|----------------------------------------------------------------------------------------------------------------------|-------------------------------------------------------------------------------------------------------------------------------------------------|-------------------------------------------------------------------------------------------------------------------------------------------------------------------------------------------------------------------------------------------------------------------------------------------------|
| Weuve et al., (2012)<br>USA<br>(Nurses' Health Study Cognitive Cohort) | 70-81 y/o;<br>100% F;<br>N=19,409                                     | Spatiotemporal GAM:<br>PM <sub>2.5</sub> ; PM <sub>2.5-10</sub> ; PM <sub>10</sub>                                                        | 1m prior to W1; from 1988 to 1m prior to W1                                                              | Verbal memory:<br>Composite score combining immediate and delayed recalls of the EBMT and the TICS                   | W1: 1995-2001<br>W2: 1997-2004<br>W3: 2002-08                                                                                                   | PM <sub>2.5-10</sub> and PM <sub>10</sub> since 1988 were associated with greater 2-year decline in verbal memory                                                                                                                                                                               |
| Tonne et al., (2014)<br>London (Whitehall II)                          | 66±6 y/o;<br>35% F;<br>N=2,867                                        | Dispersion model:<br>PM <sub>2.5</sub> ; PM <sub>10</sub>                                                                                 | 5y average prior to final assessment (2007-09); annual measure at 4y prior to final assessment (2007-09) | Short term Verbal memory: 20-word free-recall test within 2 minutes                                                  | W1: 2002-04<br>W2: 2007-09                                                                                                                      | No significant association with verbal memory level at Wave 2<br><br>PM <sub>2.5</sub> and PM <sub>10</sub> at 4 years prior Wave 2 were associated with faster 5-year decline in verbal memory, among those participants residing in greater London at both study waves                        |
| Oudin et al., (2017)<br>Sweden<br>(Betula)                             | 60-85 y/o;<br>45% F;<br>N=1,469                                       | LUR: NO <sub>x</sub>                                                                                                                      | cumulative annual mean (1988-2010)                                                                       | Episodic memory measure: Composite of 5 tasks - immediate free recall and delayed cued recall of sentences and nouns | 5 waves (1988-2010)                                                                                                                             | No association of baseline NO <sub>x</sub> with baseline episodic memory measure<br><br>No association of time-varying NO <sub>x</sub> with 5-year decline in episodic memory                                                                                                                   |
| Kulick et al., (2020a)<br>NYC<br>(WHICAP)                              | ≥65 y/o; 68% F; N=4,821                                               | Kriging: PM <sub>10</sub> ; PM <sub>2.5</sub> ; NO <sub>2</sub>                                                                           | 1y prior to enrollment                                                                                   | Episodic memory: Selective Reminding Test                                                                            | Every 18-24 months over 20 years (only used data from first 6 waves)                                                                            | PM <sub>10</sub> ; PM <sub>2.5</sub> ; NO <sub>2</sub> associated with faster episodic memory decline, and this association was greater among those ≥75 years old (interaction p<0.001)                                                                                                         |
| Kulick et al., (2020b)<br>NYC<br>(WHICAP; NOMAS)                       | WHICAP: ≥65 y/o; 67% F; N=5,330<br><br>NOMAS: ≥50 y/o; 61% F; N=1,093 | WHICAP and NOMAS: Kriging: PM <sub>10</sub> ; PM <sub>2.5</sub> ; NO <sub>2</sub><br><br>Distance from residence to nearest major roadway | 1y prior to enrollment                                                                                   | Episodic memory<br><br>WHICAP: Selective Reminding Test<br><br>NOMAS: modified CVLT                                  | WHICAP: every 18-24 months over 20 years (only used data from first 6 waves)<br><br>NOMAS: baseline (2003-2008) and one follow-up after 5 years | WHICAP: PM <sub>10</sub> ; PM <sub>2.5</sub> ; NO <sub>2</sub> associated with lower episodic memory at baseline<br><br>PM <sub>2.5</sub> and NO <sub>2</sub> associated with faster decline over time<br><br>No association of residential distance from roadway with episodic memory level at |

|                                                    |                                  |                                          |                                     |                                                                                                                       |                      |                                                                                                                                                                                                                                                                                                    |
|----------------------------------------------------|----------------------------------|------------------------------------------|-------------------------------------|-----------------------------------------------------------------------------------------------------------------------|----------------------|----------------------------------------------------------------------------------------------------------------------------------------------------------------------------------------------------------------------------------------------------------------------------------------------------|
|                                                    |                                  |                                          |                                     |                                                                                                                       |                      | baseline or episodic memory decline over time                                                                                                                                                                                                                                                      |
|                                                    |                                  |                                          |                                     |                                                                                                                       |                      | NOMAS:<br>No association of any air pollutants or residential distance from roadway with episodic memory level at baseline or episodic memory decline over time                                                                                                                                    |
| Petkus et al., (2020)<br>USA<br>(WHISCA)           | 67-83 y/o;<br>100% F;<br>N=2,202 | Spatiotemporal GAM:<br>PM <sub>2.5</sub> | 3y prior to each assessment         | CVLT: Immediate (trial 1-3) and short- or long-delayed free recall (List A)                                           | Annually (1999-2010) | PM <sub>2.5</sub> associated with accelerated declines in immediate recall, and short- & long-delayed free recall                                                                                                                                                                                  |
| Younan et al., (2020)<br>USA<br>(WHIMS-MRI&WHISCA) | 73-87 y/o;<br>100% F;<br>N=998   | Spatiotemporal GAM:<br>PM <sub>2.5</sub> | 3y prior to MRI-1 measure (2005-06) | CVLT: Immediate and delayed free recall (List A); new learning (List B); Composite score of the above List A measures | Annually (1999-2010) | PM <sub>2.5</sub> associated with faster decline in immediate recall and new learning after MRI-1, but not associated with lower level at MRI-1<br><br>No association of PM <sub>2.5</sub> with episodic memory composite score or delayed recall for either level at MRI-1 or decline after MRI-1 |

Abbreviations: CVLT, California Verbal Learning Test; EBMT, East Boston Memory Test; GAM, Generalized Additive Models; LUR, Land Use Regression; NOMAS, Northern Manhattan Study; TICS, Telephone Interview for Cognitive Status; WHISCA, Women's Health Initiative Study of Cognitive Aging; WHIMS-MRI, Women's Health Initiative Memory Study-Magnetic Resonance Imaging; WHICAP, Washington Heights Inwood Community Aging Project

## References

- Kulick ER, Elkind MSV, Boehme AK, Joyce NR, Schupf N, Kaufman JD, et al. 2020a. Long-term exposure to ambient air pollution, apoe-ε4 status, and cognitive decline in a cohort of older adults in northern manhattan. *Environ Int* 136:105440.
- Kulick ER, Wellenius GA, Boehme AK, Joyce NR, Schupf N, Kaufman JD, et al. 2020b. Long-term exposure to air pollution and trajectories of cognitive decline among older adults. *Neurology*.
- Oudin A, Forsberg B, Lind N, Nordin S, Oudin Åström D, Sundström A, et al. 2017. Is long-term exposure to air pollution associated with episodic memory? A longitudinal study from northern sweden. *Sci Rep* 7:12789.
- Petkus AJ, Younan D, Widaman K, Gatz M, Manson JE, Wang X, et al. 2020. Exposure to fine particulate matter and temporal dynamics of episodic memory and depressive symptoms in older women. *Environ Int* 135:105196.
- Tonne C, Elbaz A, Beevers S, Singh-Manoux A. 2014. Traffic-related air pollution in relation to cognitive function in older adults. *Epidemiology* 25:674-681.
- Weuve J, Puett RC, Schwartz J, Yanosky JD, Laden F, Grodstein F. 2012. Exposure to particulate air pollution and cognitive decline in older women. *Arch Intern Med* 172:219-227.
- Younan D, Petkus AJ, Widaman KF, Wang X, Casanova R, Espeland MA, et al. 2020. Particulate matter and episodic memory decline mediated by early neuroanatomic biomarkers of alzheimer's disease. *Brain* 143:289-302.
